# Supplementary material
Source: PubMed Central journal article supplement (PMC3442239)
Supplement: NIHMS48525-supplement-2.pdf [file NIHMS48525-supplement-2.pdf]

## Supplementary Fig. 1



**Supplementary Figure 1.** Changes in ATP and lactate in proliferating and differentiated retinas after oxidative phosphorylation and glycolysis inhibitors. **(a)** ATP at different time points after NaN3 addition *in vivo*, normalised to control levels (P, n=4-25 per time point; D, n=4). **(b)** ATP at different time points after NaN3 addition in explants in MBS, normalised to control levels (P, n=4-16 per time point; D, n=4). **(c)** ATP normalised to control levels in freshly dissected explants in MBS with Antimycin A (P, n=13, p=0.003; D, n=13, p=10<sup>-6</sup> compared to control; p=4x10<sup>-6</sup> drop in proliferating compared to differentiated cells). **(d)** ATP normalised to controls in freshly dissected explants in MBS with Oligomycin (t=10: P, n=5, p>0.05; D, n=5, p>0.05 compared to controls. t=20: P, n=10, p>0.05; D, n=9, p=0.002 compared to controls, and p=0.002 drop in proliferating compared to differentiated cells. t=30: P, n=12, p>0.05; D, n=14, p=2x10<sup>-6</sup> compared to controls, p=10<sup>-6</sup> drop in proliferating compared to differentiated cells). **(e)** ATP levels in freshly explanted retinas incubated with 2-deoxy-D-glucose (2DG) and NaN3 in 1x MBS (p>0.05 for all conditions, control n=21, 2DG n=8, NaN3 n=5, 2DG + NaN3 n=8). **(f)** Intracellular lactate after 3 hours of incubation with 2DG (n=6, p>0.05). **(g)** ATP levels in freshly explanted retinas in L15, incubated with NaN3, GPI and 2DG (n=5, p<0.001 for GPI + NaN3 or 2DG + GPI + NaN3 compared to control or NaN3 alone). Error bars in all figures show 95% confidence intervals; \* 0.001 < p < 0.05; \*\* p < 0.001.
