# Supplementary material
Source: PubMed Central journal article supplement (PMC3442239)
Supplement: NIHMS48525-supplement-3.pdf [file NIHMS48525-supplement-3.pdf]

## Supplementary Fig. 2

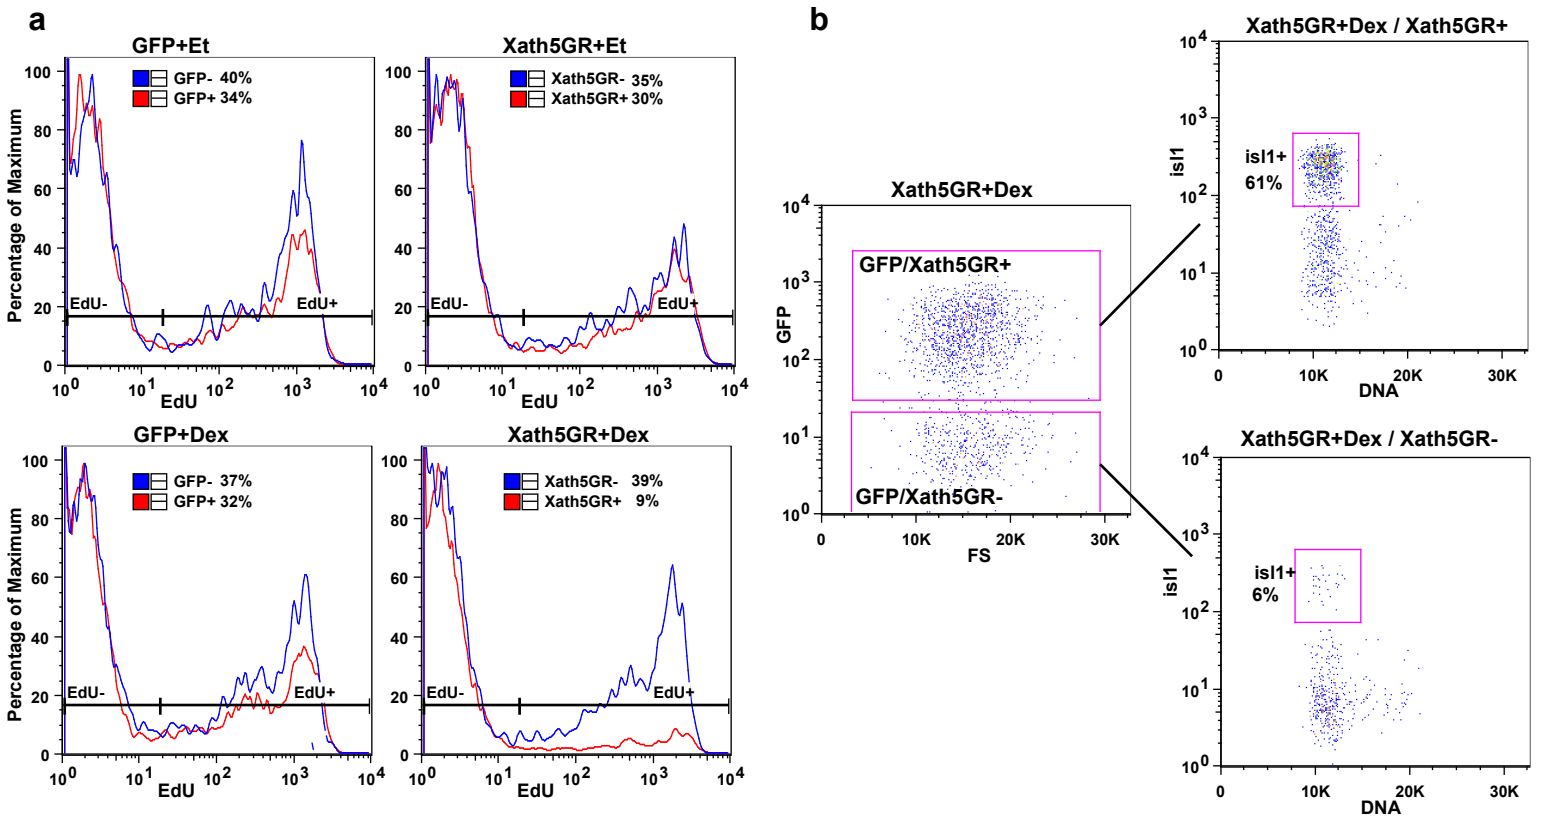

**Supplementary Figure 2.** Overexpression of Xath5GR mRNA and induction by dexamethasone (Dex) at stage 25 inhibits proliferation and promotes differentiation into isI1+ cells. **(a)** At stage 33/4, Xath5GR (bottom right panel) inhibits proliferation of overexpressing cells (Xath5GR+, red histogram) compared to non-overexpressing cells in the same retinas (Xath5GR-, blue histogram) when Dex is added, but not when a corresponding concentration of the ethanol (Et) solvent is used instead of Dex (top right panel), or when only GFP mRNA is injected, with or without Dex (left panels). **(b)** GFP/Xath5GR+ cells (top right panel) have a much higher proportion of postmitotic isI1+ cells compared to GFP/Xath5GR- control cells (bottom right) in the same retina at stage 39. The scheme of separation of GFP+ and GFP- cells from the GFP/Xath5GR co-injection is shown on the left panel.
