# Supplementary material
Source: PubMed Central journal article supplement (PMC3442239)
Supplement: NIHMS48525-supplement-5.pdf [file NIHMS48525-supplement-5.pdf]

## Supplementary Fig. 4

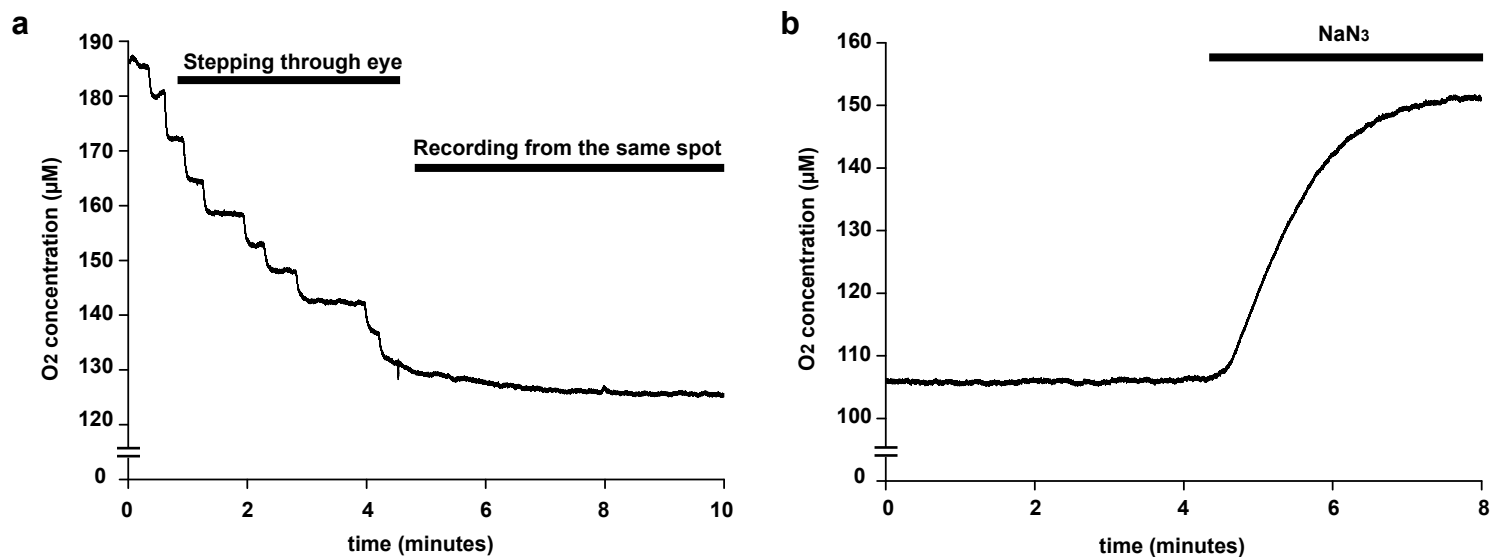

**Supplementary Figure 4.** (a) Variation in [O<sub>2</sub>] as the electrode is pushed deeper in the retina in steps. (b) Increase in [O<sub>2</sub>] deep in the tissue after addition of NaN<sub>3</sub> in the bath.
