# Supplementary material
Source: PubMed Central journal article supplement (PMC3442239)
Supplement: NIHMS48525-supplement-6.pdf [file NIHMS48525-supplement-6.pdf]

### **Supplementary Movie Legend**

EB3-GFP motion stops in progenitor cells **(a)** earlier than in post-mitotic neurons **(b)**. Embryos were incubated in Antimycin A, and after an incubation period of 20 minutes, imaged by spinning disk confocal microscopy at 20-second intervals. The two examples shown were from the same imaging session and drug treatment in the same dish.
